# Supplementary material for: Multiple nuclear-replicating viruses require the stress-induced protein ZC3H11A for efficient growth
Source: PubMed Central journal article supplement — Proc Natl Acad Sci U S A. 2018 Apr 2;115(16):E3808–16. doi: 10.1073/pnas.1722333115 (PMC5910864; doi:10.1073/pnas.1722333115), 2018-04-02
Supplement: pnas.201722333SI.pdf [file pnas.201722333SI.pdf]

# Supporting Information

Younis et al. 10.1073/pnas.1722333115

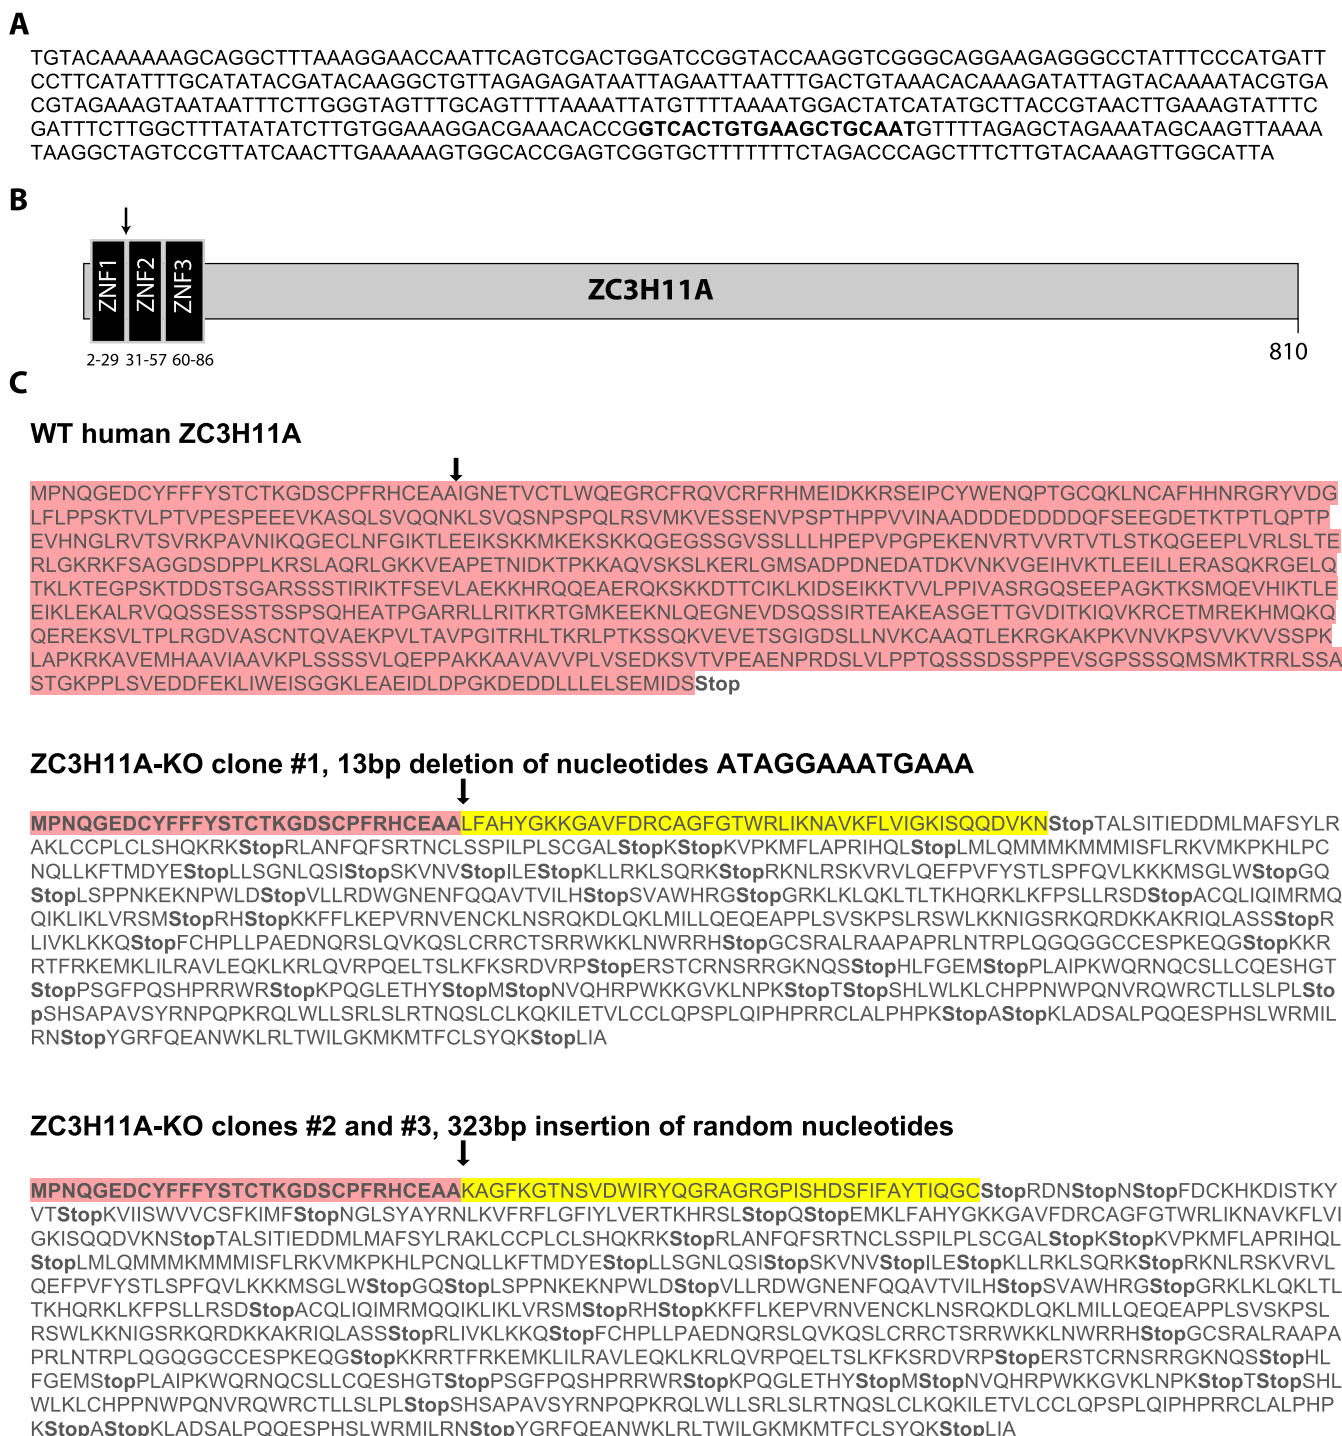

**Fig. S1.** (A) Sequence of the gRNA expression fragment. The specific ZC3H11A gRNA sequence is shown in bold. (B) Schematic description of the ZC3H11A protein showing the location of the three zinc fingers. The arrow indicates the corresponding location of the gRNA in the ZC3H11A protein. (C, Top) Amino acid sequence of the WT human ZC3H11A protein. (C, Middle and Bottom) Amino acid sequences of the ZC3H11A proteins expressed in KO clones 1–3. The red-highlighted sequences represent the WT ZC3H11A sequence, whereas the yellow-highlighted sequences represent the short out-of-frame added peptide sequences caused by the deletion of 13 bp or the insertion of 323 bp. “Stop” indicates a translational stop codon in the ORF.



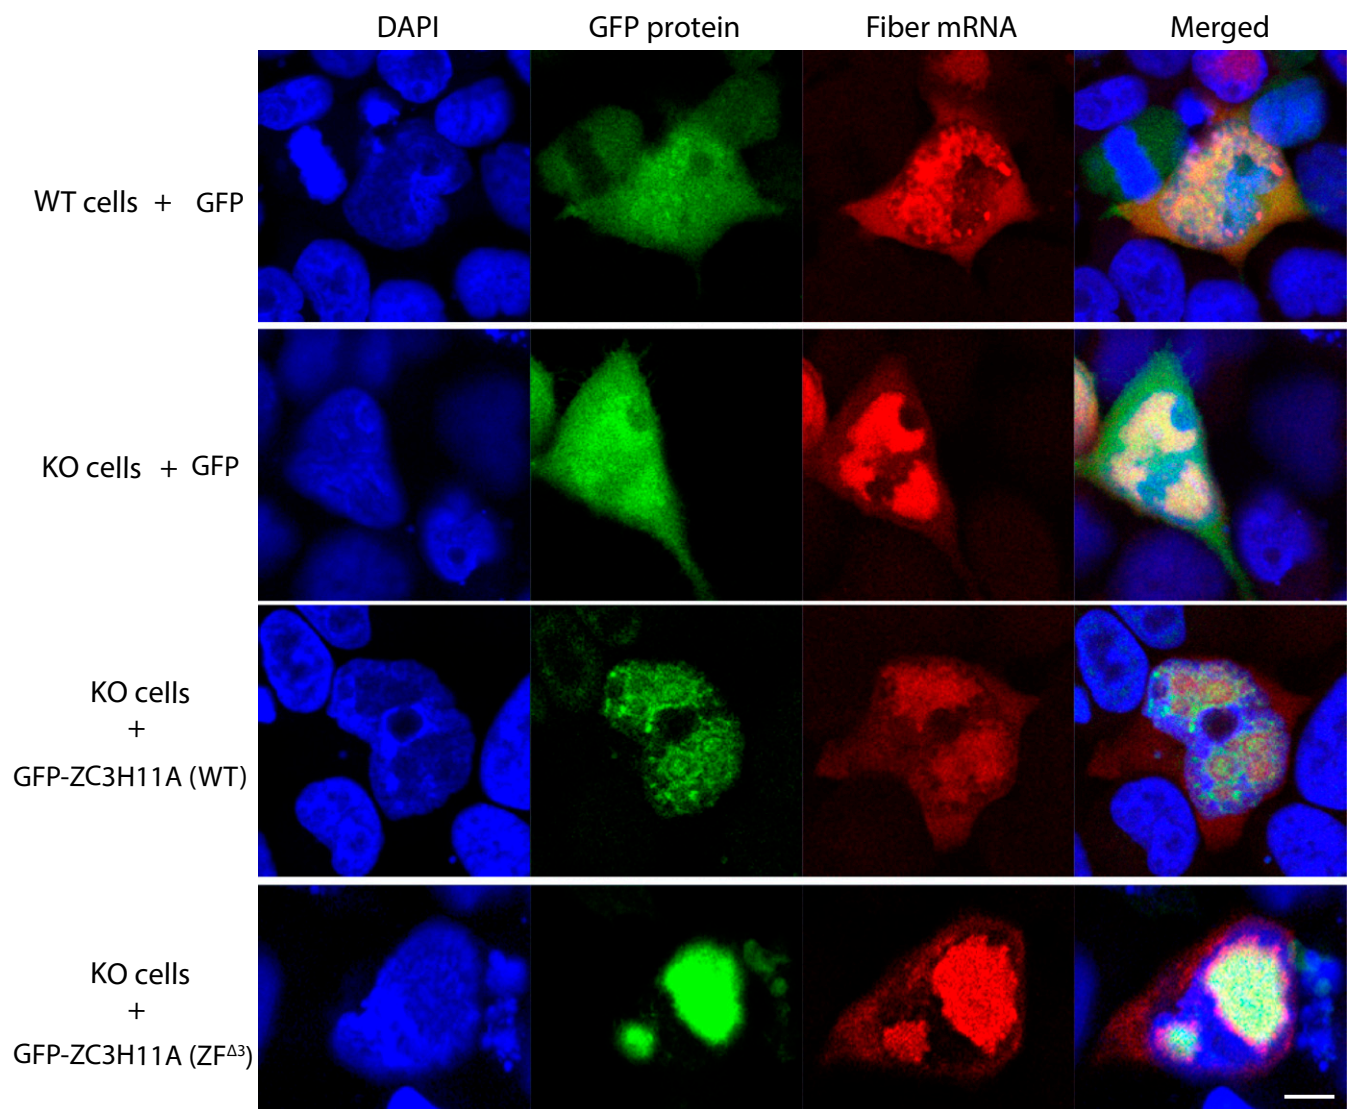

**Fig. S4.** RNA-FISH of fiber mRNA in WT and ZC3H11A-KO cells transfected with plasmids expressing full-length GFP-ZC3H11A or the mutant GFP-ZC3H11A protein lacking zinc fingers (ZF<sup>Δ3</sup>). The GFP-expressing plasmid construct was used as a control. GFP expression was measured by fluorescence microscopy. (Scale bar: 6 μm.)

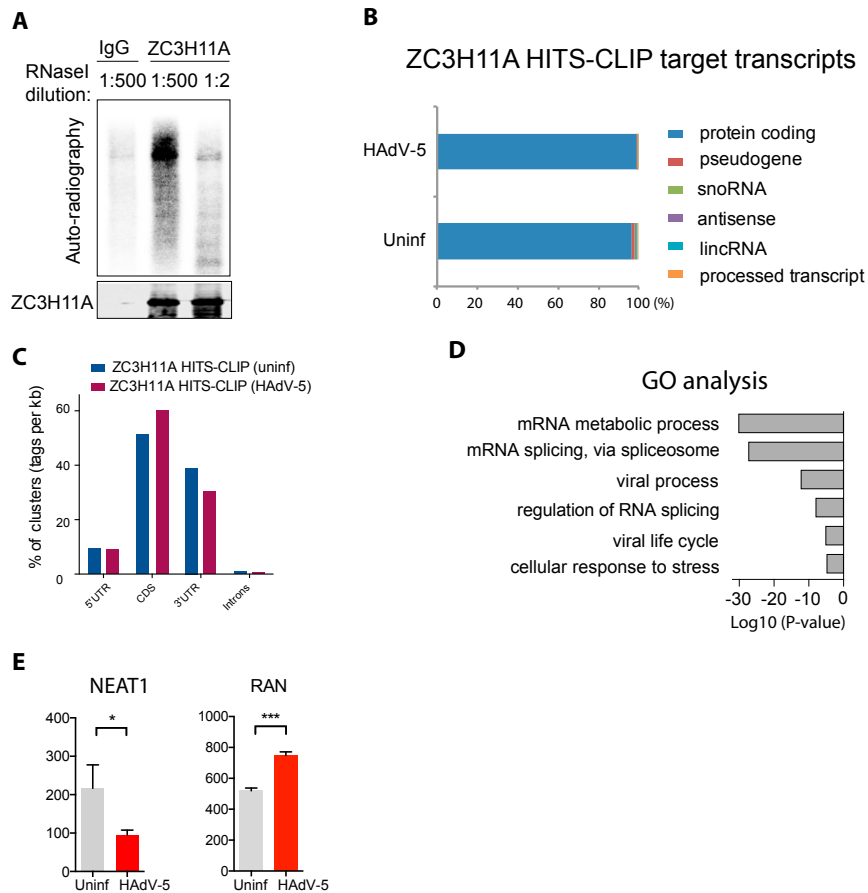

**Fig. S5.** (A) SDS/PAGE of cross-linked  $^{32}\text{P}$ -labeled RNA/protein complexes obtained after IgG or ZC3H11A immunoprecipitation and treatment with RNaseI (dilutions: 1:500 and 1:2). (B) Distribution of ZC3H11A HITS-CLIP targets in uninfected (Uninf) and HAdV-5-infected cells. snoRNA, small nucleolar RNA. (C) Distribution of the proportion of ZC3H11A HITS-CLIP mapped reads (tags per kilobase) over the various elements of a gene in Uninf and HAdV-5-infected cells. (D) GO analysis of the endogenous gene targets of ZC3H11A shared before and after HAdV-5 infection. Gray bars, multiple testing corrected  $P$  values for enriched GO categories. (E) Expression of the *NEAT1* and *RAN* mRNAs in Uninf and HAdV-5-infected HeLa cells (\*\*\* $P < 0.001$ , \* $P < 0.05$ ).

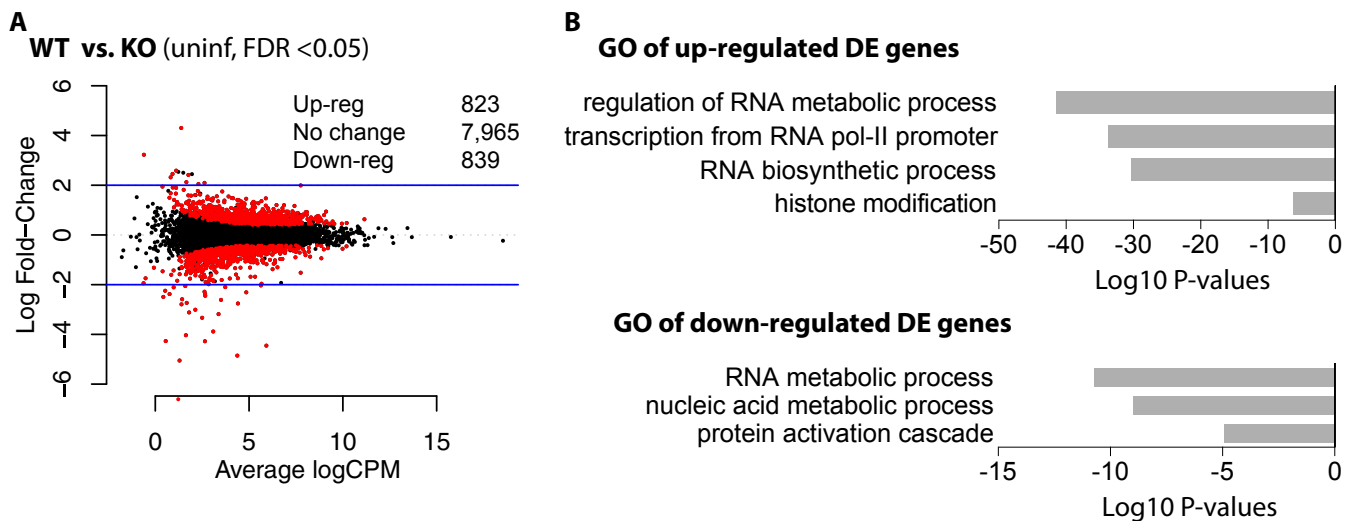

**Fig. S6.** Results of RNA-seq analysis of uninfected (uninf) WT and ZC3H11A-KO cells. (A) Smear plot of log-fold changes against expression levels measured as the log count per million (logCPM) of cytoplasmic mRNA in WT vs. ZC3H11A-KO cells. The lines indicate twofold changes, and red dots indicate significant fold change [false discovery rate (FDR) < 0.05]. reg, regulated. (B) GO analysis of significantly up- and down-regulated transcripts in uninf WT and ZC3H11A-KO cells. Gray bars, multiple testing corrected  $P$  values for enriched GO categories.



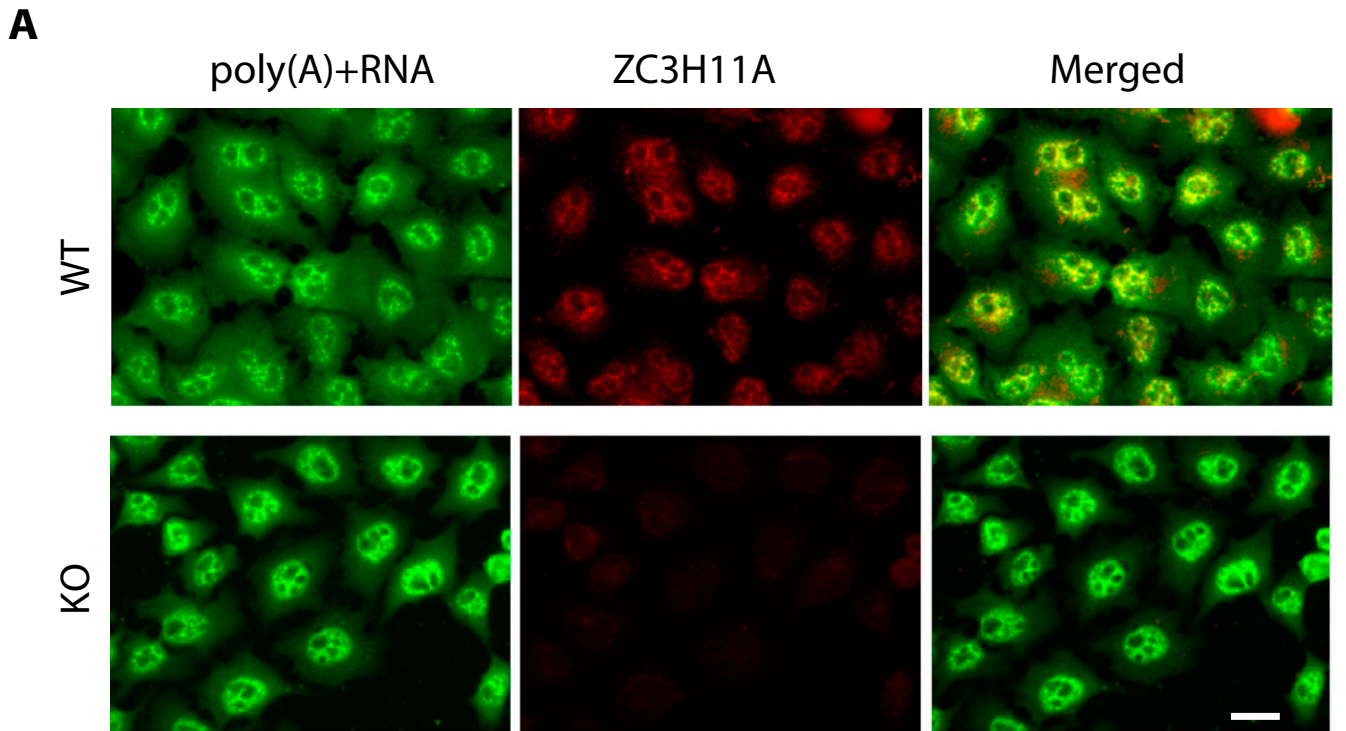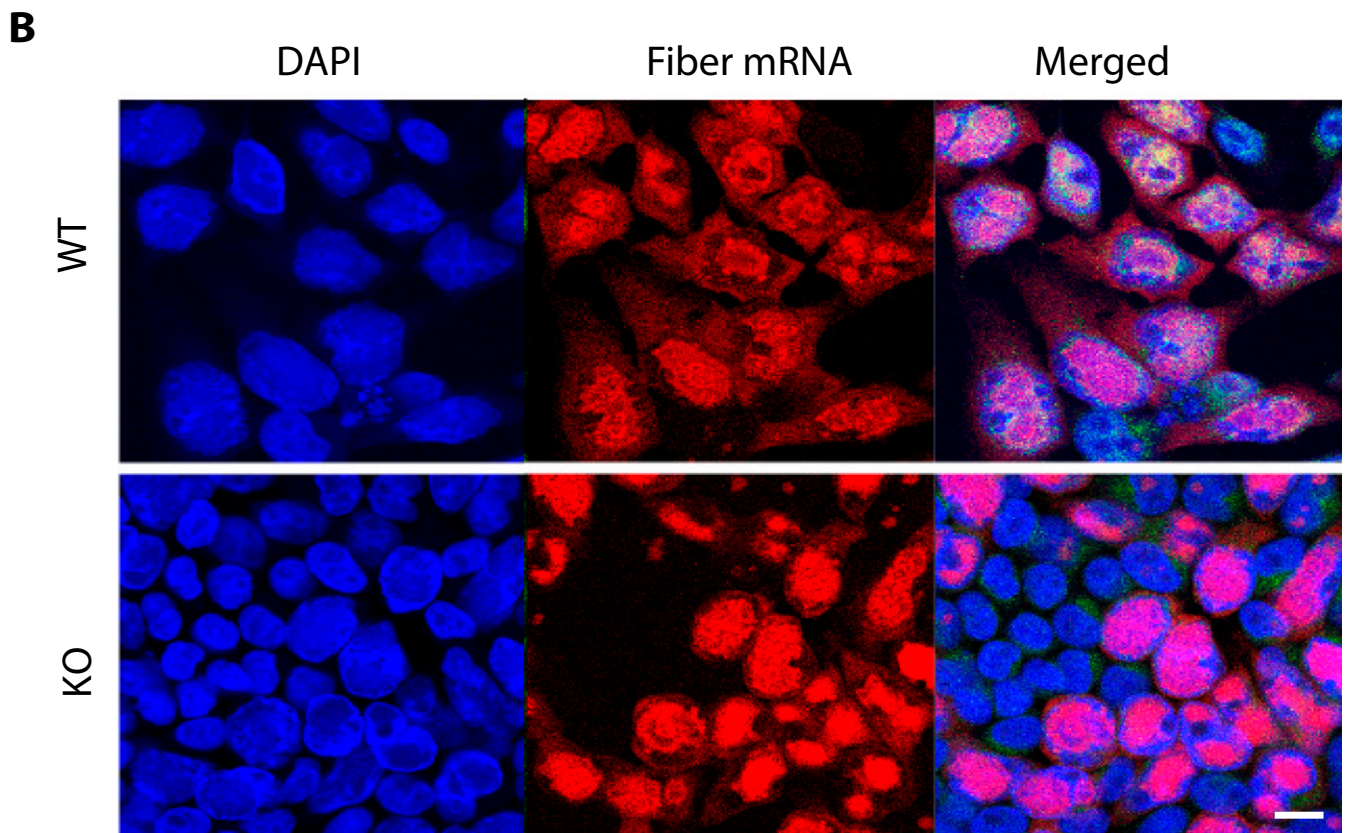

**C** Fiber probe sequence

TTGAAGGTATCTTCAGACGGTCTTGCGCGCTTCATTGCGACTG  
 TGACTGGTTAGACGCCTTTCTCGAGAG

Fig. S7. (A) RNA-FISH detecting poly(A)<sup>+</sup> RNA accumulation in WT and ZC3H11A-KO cells. (Scale bar: 15 μm.) (B) RNA-FISH of fiber mRNA accumulation in WT and ZC3H11A-KO cells. (Scale bar: 7 μm.) (C) Sequence of the FISH probe used to detect the fiber mRNA.

**Table S1. List of antibodies**

| Antibody                            | Type      | Host   | Dilution | Application | Source                   |
|-------------------------------------|-----------|--------|----------|-------------|--------------------------|
| ZC3H11A                             | Primary   | Rabbit | 1:3,000  | WB          | Abcam                    |
| ZC3H11A                             | Primary   | Rabbit | 1:500    | IF          | Human Protein Atlas      |
| ZC3H11A                             | Primary   | Rabbit | 4–5 µg   | IP          | Human Protein Atlas      |
| GFP                                 | Primary   | Rabbit | 1:1,000  | WB          | Novus Biologicals        |
| HAdV-5 capsid proteins              | Primary   | Rabbit | 1:5,000  | WB          | Abcam                    |
| VP16                                | Primary   | Rabbit | 1:5,000  | WB          | Abcam                    |
| VP5                                 | Primary   | Rabbit | 1:5,000  | WB          | Abcam                    |
| β-Actin                             | Primary   | Goat   | 1:10,000 | WB          | Abcam                    |
| Influenza A M2 (14C2)               | Primary   | Mouse  | 1:200    | WB          | Abcam                    |
| Influenza A NP (5D8)                | Primary   | Mouse  | 1:200    | WB          | Santa Cruz Biotechnology |
| ZBED6                               | Primary   | Rabbit | 1:2,000  | WB          | In-house                 |
| HSP-70                              | Primary   | Mouse  | 1:1,000  | WB          | Invitrogen               |
| SUMO 2+3                            | Primary   | Mouse  | 2–5 µg   | IP          | Abcam                    |
| HIV1 (p55 + p24 + p17)              | Primary   | Rabbit | 1:1,000  | WB          | Abcam                    |
| Anti-mouse IgG Alexa Fluor-488      | Secondary | Goat   | 1:500    | IF          | Invitrogen               |
| Anti-rabbit IgG Alexa Fluor-594     | Secondary | Goat   | 1:500    | IF          | Invitrogen               |
| Fluorescent anti-rabbit IgG (green) | Secondary | Goat   | 1:10,000 | WB          | LI-COR                   |
| Fluorescent anti-mouse IgG (red)    | Secondary | Goat   | 1:10,000 | WB          | LI-COR                   |

IF, immunofluorescence; IP, immunoprecipitation; WB, Western blot.

**Table S2. Primer sequences**

| ID | Primer            | Sequences                  |
|----|-------------------|----------------------------|
| 1  | ZBED6 (forward)   | TCTTTCATGTTGACCCCAAGTA     |
| 2  | ZBED6 (reverse)   | CTGACGCTTTTCTCACAGAGGTT    |
| 3  | ZC3H11A (forward) | AAGGAAGGACTTACCCATTTGATATT |
| 4  | ZC3H11A (reverse) | TGGGTCAGATTTCCCTATGAGAA    |
| 5  | β-Actin (forward) | GCAAAGACCTGACGCCAAC        |
| 6  | β-Actin (reverse) | ACATCTGCTGGAAGGTGGAC       |
| 7  | Gag/Pol (forward) | TTCTTCAGAGCAGACCAGAGC      |
| 8  | Gag/Pol (reverse) | GCTGCCAAAGAGTGATCTGA       |
| 9  | Tat1 (forward)    | AGGGCGGCGACTGAATTGGGT      |
| 10 | Tat1 (reverse)    | CTCGGGATTGGGAGGTGGGT       |
| 11 | Renilla (forward) | GATGGATTGCACGCAGGTTT       |
| 12 | Renilla (reverse) | CAGCCGATTGCTGTGTGTGC       |

## Dataset S1. Results of HITS-CLIP analysis

[Dataset S1](#)
